# Supplementary material for: Analyzing Twitter Conversation on Genome-Edited Foods and Their Labeling in Japan
Source: PubMed Central journal article supplement (PMC7642521; doi:10.3389/fpls.2020.535764), 2020-10-22
Supplement: Image_1.pdf [file Image_1.pdf]

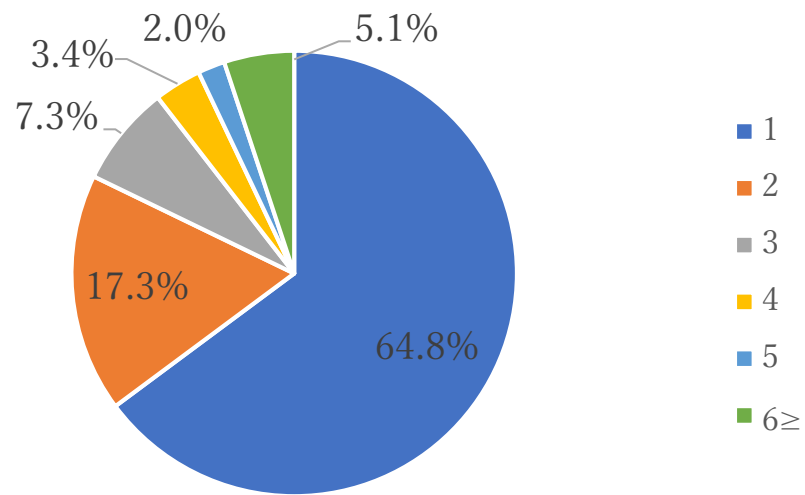

Supplementary Figure 1. Percentage of average tweet counts per user ID across the survey period.
