# Supplementary material for: Analyzing Twitter Conversation on Genome-Edited Foods and Their Labeling in Japan
Source: PubMed Central journal article supplement (PMC7642521; doi:10.3389/fpls.2020.535764), 2020-10-22
Supplement: Table_1.pdf [file Table_1.pdf]

Supplementary Table 1. Stopwords

| Type of Words         | Stopwords                                                                                                                                             |
|-----------------------|-------------------------------------------------------------------------------------------------------------------------------------------------------|
| Letters               | Meaningless English/Japanese words, single characters, and single Chinese characters that are meaningless or related to a day of week                 |
| Proper nouns          | Names, RT+UserID, title (e.g. minister), Place names                                                                                                  |
| Verbs                 | “be”, “think”, “do”, “say”, “want” and, inflected forms of these verbs                                                                                |
| Other parts of speech | Pronouns, demonstrative pronouns, interjections, suffixes, prefixes, connectives, temporal nouns, Japanese abstract nouns (e.g. “koto”, “no”, “mono”) |
| Specific words        | Please RT, news, regulation, duty, campaigns, signatures, activities, other, by chance, results, finally, fact                                        |

Notes: Original Stopwords were Japanese.

Specific words were excluded from the analysis because they appeared frequently in tweets and could have become impeditive factors.
